# Supplementary material for: Methylome Variation Predicts Exemestane Resistance in Advanced ER+ Breast Cancer
Source: PubMed Central journal article supplement — Technol Cancer Res Treat. 2020 Mar 4;19:1533033819896331. doi: 10.1177/1533033819896331 (PMC7057408; doi:10.1177/1533033819896331), 2020-03-04
Supplement: Copy_of_Suplementary_Table_4.pdf [file Copy_of_Suplementary_Table_4.pdf]

|                                                          | Age of diagnosis |           |
|----------------------------------------------------------|------------------|-----------|
|                                                          | ≤45              | >45       |
| Baseline Methylation density Chr1(149600000-149799999)   | 1.16±0.06        | 1.23±0.18 |
| Baseline Methylation density Chr3 (67800000-67999999)    | 1.49±0.09        | 1.53±0.21 |
| Baseline Methylation density Chr3 (140200000-140399999)  | 1.49±0.09        | 1.52±0.23 |
| Baseline Methylation density Chr6 (32400000-32599999)    | 1.11±0.22        | 1.03±0.29 |
| Baseline Methylation density Chr9 (46800000-46999999)    | 1.49±0.14        | 1.51±0.24 |
| Baseline Methylation density Chr10 (46400000-46599999)   | 1.27±0.09        | 1.25±0.16 |
| Baseline Methylation density Chr12 (101200000-101399999) | 1.51±0.12        | 1.55±0.23 |
| Baseline Methylation ratio Chr1(149600000-149799999)     | 0.64±0.03        | 0.67±0.06 |
| Baseline Methylation ratio Chr3 (67800000-67999999)      | 0.80±0.02        | 0.80±0.03 |
| Baseline Methylation ratio Chr3 (140200000-140399999)    | 0.80±0.03        | 0.80±0.03 |
| Baseline Methylation ratio Chr6 (32400000-32599999)      | 0.81±0.09        | 0.74±0.08 |
| Baseline Methylation ratio Chr9 (46800000-46999999)      | 0.81±0.02        | 0.79±0.04 |
| Baseline Methylation ratio Chr10 (46400000-46599999)     | 0.84±0.05        | 0.83±0.06 |
| Baseline Methylation ratio Chr12 (101200000-101399999)   | 0.79±0.03        | 0.78±0.03 |

---

*P*

---

0.410

0.683

0.741

0.601

0.883

0.755

0.680

0.361

0.939

0.961

0.173

0.122

0.810

0.746

---
