# Supplementary material for: Methylome Variation Predicts Exemestane Resistance in Advanced ER+ Breast Cancer
Source: PubMed Central journal article supplement — Technol Cancer Res Treat. 2020 Mar 4;19:1533033819896331. doi: 10.1177/1533033819896331 (PMC7057408; doi:10.1177/1533033819896331), 2020-03-04
Supplement: Copy_of_Supplementary_Table_3.pdf [file Copy_of_Supplementary_Table_3.pdf]

|                       |                     | Body Mass Index (BMI) | Baseline Methylation density Chr1(1496000-149799999) | Baseline Methylation density Chr3 (67800000-67999999) | Baseline Methylation density Chr3 (140200000-140399999) |
|-----------------------|---------------------|-----------------------|------------------------------------------------------|-------------------------------------------------------|---------------------------------------------------------|
| Body Mass Index (BMI) | Pearson correlation | 1                     | .014                                                 | -.001                                                 | -.105                                                   |
|                       | Sig. (two sides)    |                       | .961                                                 | .998                                                  | .709                                                    |
|                       | N                   | 16                    | 16                                                   | 16                                                    | 16                                                      |

**Correlation coefficient**

| Baseline Methylation density Chr6 (32400000-32599999) | Baseline Methylation density Chr9 (46800000-46999999) | Baseline Methylation density Chr10 (46400000-46599999) | Baseline Methylation density Chr12 (101200000-101399999) | Baseline Methylation ratio Chr1(149600000-149799999) | Baseline Methylation ratio Chr3 (67800000-67999999) | Baseline Methylation ratio Chr3 (140200000-140399999) |
|-------------------------------------------------------|-------------------------------------------------------|--------------------------------------------------------|----------------------------------------------------------|------------------------------------------------------|-----------------------------------------------------|-------------------------------------------------------|
| .141                                                  | -.194                                                 | -.073                                                  | -.094                                                    | -.133                                                | -.398                                               | -.409                                                 |
| .617                                                  | .488                                                  | .796                                                   | .740                                                     | .636                                                 | .141                                                | .131                                                  |
| 16                                                    | 16                                                    | 16                                                     | 16                                                       | 16                                                   | 16                                                  | 16                                                    |

| Baseline Methylation ratio Chr6 (32400000-32599999) | Baseline Methylation ratio Chr9 (46800000-46999999) | Baseline Methylation ratio Chr10 (46400000-46599999) | Baseline Methylation ratio Chr12 (101200000-101399999) |
|-----------------------------------------------------|-----------------------------------------------------|------------------------------------------------------|--------------------------------------------------------|
| -.138                                               | -.287                                               | -.381                                                | -.351                                                  |
| .623                                                | .299                                                | .161                                                 | .200                                                   |
| 16                                                  | 16                                                  | 16                                                   | 16                                                     |
