# Supplementary material for: Methylome Variation Predicts Exemestane Resistance in Advanced ER+ Breast Cancer
Source: PubMed Central journal article supplement — Technol Cancer Res Treat. 2020 Mar 4;19:1533033819896331. doi: 10.1177/1533033819896331 (PMC7057408; doi:10.1177/1533033819896331), 2020-03-04
Supplement: Supplementary_Table_1_EXEr_related_differential_methylation_density_regions.pdf [file Supplementary_Table_1_EXEr_related_differential_methylation_density_regions.pdf]

| Chro No. | Start     | End       | P-value | Overlap Gene                                                        |
|----------|-----------|-----------|---------|---------------------------------------------------------------------|
| chr1     | 4800000   | 4999999   | 0.023   | AJAP1                                                               |
| chr1     | 22600000  | 22799999  | 0.019   | ZBTB40                                                              |
| chr1     | 49000000  | 49199999  | 0.025   | AGBL4;BEND5                                                         |
| chr1     | 56800000  | 56999999  | 0.02    | PPAP2B                                                              |
| chr1     | 68200000  | 68399999  | 0.026   | GNG12;GNG12-AS1                                                     |
| chr1     | 117200000 | 117399999 | 0.029   | IGSF3;C1orf137;CD2                                                  |
| chr1     | 143200000 | 143399999 | 0.03    | LOC102723769                                                        |
| chr1     | 149600000 | 149799999 | 0.026   | LINC00623;LINC00869;LOC103091866;RNVU1-20;HIST2H2BF;FCGR1A;HIST2H3D |
| chr1     | 206000000 | 206199999 | 0.02    | FAM72C;FAM72A                                                       |
| chr1     | 235000000 | 235199999 | 0.031   | LOC101927851                                                        |
| chr2     | 105200000 | 105399999 | 0.029   | LINC01114                                                           |
| chr2     | 150600000 | 150799999 | 0.03    | LOC101929231                                                        |
| chr2     | 242800000 | 242999999 | 0.026   | PDCD1;RTP5;LINC01237;LOC102723927                                   |
| chr3     | 1000000   | 1199999   | 0.026   | CNTN6                                                               |
| chr3     | 67800000  | 67999999  | 0.026   | SUCLG2-AS1                                                          |
| chr3     | 124800000 | 124999999 | 0.02    | SLC12A8;ZNF148                                                      |
| chr3     | 140200000 | 140399999 | 0.029   | CLSTN2;CLSTN2-AS1;TRIM42                                            |
| chr3     | 149000000 | 149199999 | 0.015   | TM4SF18;TM4SF1;TM4SF1-AS1;TM4SF4                                    |
| chr3     | 172200000 | 172399999 | 0.028   | TNFSF10;NCEH1                                                       |
| chr3     | 176600000 | 176799999 | 0.026   | TBL1XR1                                                             |
| chr3     | 182000000 | 182199999 | 0.027   | FLJ46066                                                            |
| chr3     | 187800000 | 187999999 | 0.031   | LPP-AS2;LPP;FLJ42393                                                |
| chr4     | 54400000  | 54599999  | 0.03    | LNX1;LNX1-AS2;LOC100506444                                          |
| chr5     | 10800000  | 10999999  | 0.021   | CTNND2                                                              |
| chr5     | 68800000  | 68999999  | 0.011   | OCLN;GTF2H2C;GTF2H2C_2;LOC100272216;GUSBP3                          |

|       |           |           |       |                                                                                                                      |
|-------|-----------|-----------|-------|----------------------------------------------------------------------------------------------------------------------|
| chr5  | 109600000 | 109799999 | 0.029 | TMEM232                                                                                                              |
| chr5  | 148600000 | 148799999 | 0.027 | ABLIM3;AFAP1L1;GRPEL2;PCYOX1L;IL17B                                                                                  |
| chr5  | 150600000 | 150799999 | 0.03  | CCDC69;GM2A;SLC36A3;SLC36A2                                                                                          |
| chr5  | 156000000 | 156199999 | 0.028 | SGCD                                                                                                                 |
| chr6  | 32400000  | 32599999  | 0.005 | HLA-DRA;HLA-DRB5;HLA-DRB6;HLA-DRB1                                                                                   |
| chr6  | 37600000  | 37799999  | 0.027 | MDGA1;ZFAND3                                                                                                         |
| chr6  | 142800000 | 142999999 | 0.027 | LOC153910                                                                                                            |
| chr6  | 157600000 | 157799999 | 0.027 | TMEM242                                                                                                              |
| chr6  | 158000000 | 158199999 | 0.031 | ZDHHC14                                                                                                              |
| chr6  | 170200000 | 170399999 | 0.02  | LINC00574                                                                                                            |
| chr7  | 8000000   | 8199999   | 0.031 | LOC100505921;GLCCI1;ICA1                                                                                             |
| chr7  | 102400000 | 102599999 | 0.018 | FAM185A;FBXL13;LRRC17                                                                                                |
| chr7  | 143200000 | 143399999 | 0.02  | EPHA1-AS1;CTAGE15;TCAF2;TCAF2P1                                                                                      |
| chr7  | 148000000 | 148199999 | 0.031 | CNTNAP2                                                                                                              |
| chr8  | 76000000  | 76199999  | 0.031 | CASC9                                                                                                                |
| chr9  | 13000000  | 13199999  | 0.025 | MPDZ                                                                                                                 |
| chr9  | 46800000  | 46999999  | 0.019 | FAM74A1;SPATA31A5;SPATA31A7;FAM74A6;ANKRD20A3;FOXD4L4;<br>LOC101928381;LOC286297;LOC103908605;LOC102723709;LINC01189 |
| chr9  | 105400000 | 105599999 | 0.031 | LINC00587                                                                                                            |
| chr10 | 12400000  | 12599999  | 0.019 | CAMK1D                                                                                                               |
| chr10 | 22800000  | 22999999  | 0.016 | PIP4K2A                                                                                                              |
| chr10 | 29600000  | 29799999  | 0.031 | LYZL1;SVIL-AS1;SVIL                                                                                                  |
| chr10 | 46400000  | 46599999  | 0.019 | PTPN20                                                                                                               |
| chr10 | 78000000  | 78199999  | 0.023 | C10orf11                                                                                                             |
| chr10 | 117400000 | 117599999 | 0.025 | ATRNL1                                                                                                               |
| chr10 | 124200000 | 124399999 | 0.027 | ARMS2;HTRA1;DMBT1                                                                                                    |

|       |           |           |       |                                         |
|-------|-----------|-----------|-------|-----------------------------------------|
| chr11 | 35000000  | 35199999  | 0.029 | PDHX;LOC100507144;CD44                  |
| chr11 | 36400000  | 36599999  | 0.013 | PRR5L;TRAF6;RAG1                        |
| chr11 | 40600000  | 40799999  | 0.023 | LRRC4C                                  |
| chr11 | 41800000  | 41999999  | 0.026 | LINC01499                               |
| chr11 | 90200000  | 90399999  | 0.03  | DISC1FP1                                |
| chr11 | 93800000  | 93999999  | 0.03  | HEPHL1;PANX1                            |
| chr11 | 101000000 | 101199999 | 0.018 | PGR;LOC101054525                        |
| chr12 | 67800000  | 67999999  | 0.016 | LOC100507175                            |
| chr12 | 73600000  | 73799999  | 0.014 | LOC101928137                            |
| chr12 | 101200000 | 101399999 | 0.016 | ANO4                                    |
| chr12 | 124800000 | 124999999 | 0.025 | ZNF664-FAM101A;FAM101A;NCOR2            |
| chr13 | 53000000  | 53199999  | 0.021 | VPS36;CKAP2;TPTE2P3;HNRNPA1L2           |
| chr13 | 69400000  | 69599999  | 0.029 | LINC00550                               |
| chr13 | 93600000  | 93799999  | 0.021 | LINC00363                               |
| chr13 | 103200000 | 103399999 | 0.031 | TPP2;METTL21C;CCDC168                   |
| chr14 | 82000000  | 82199999  | 0.027 | SEL1L;LINC01467                         |
| chr14 | 91000000  | 91199999  | 0.031 | TTC7B;LOC101928909                      |
| chr16 | 73000000  | 73199999  | 0.028 | ZFHX3;HCCAT5;C16orf47                   |
| chr17 | 16600000  | 16799999  | 0.028 | CCDC144A;USP32P1;FAM106CP;KRT16P2       |
| chr17 | 44200000  | 44399999  | 0.019 | KANSL1;KANSL1-AS1;LRRC37A;ARL17A;ARL17B |
| chr18 | 39800000  | 39999999  | 0.012 | LINC00907                               |
| chr18 | 45600000  | 45799999  | 0.025 | ZBTB7C                                  |
| chr20 | 800000    | 999999    | 0.028 | FAM110A;ANGPT4;RSPO4                    |
| chr20 | 35800000  | 35999999  | 0.029 | MROH8;RPN2;GHRH;MANBAL;SRC              |
| chr21 | 46400000  | 46599999  | 0.028 | LINC00163;LINC00162;SSR4P1;ADARB1       |
| chrX  | 24800000  | 24999999  | 0.028 | POLA1                                   |

|      |           |           |       |                 |
|------|-----------|-----------|-------|-----------------|
| chrX | 42600000  | 42799999  | 0.031 | PPP1R2P9        |
| chrX | 55600000  | 55799999  | 0.023 | FOXR2;RRAGB     |
| chrX | 104400000 | 104599999 | 0.024 | IL1RAPL2;TEX13A |

---
