# Supplementary material for: Methylome Variation Predicts Exemestane Resistance in Advanced ER+ Breast Cancer
Source: PubMed Central journal article supplement — Technol Cancer Res Treat. 2020 Mar 4;19:1533033819896331. doi: 10.1177/1533033819896331 (PMC7057408; doi:10.1177/1533033819896331), 2020-03-04
Supplement: Supplementary_Table_2_EXEr_related_differential_methylation_ratio_regions.pdf [file Supplementary_Table_2_EXEr_related_differential_methylation_ratio_regions.pdf]

| Chr No. | Start     | End       | P-value | Overlap Gene                                                                              |
|---------|-----------|-----------|---------|-------------------------------------------------------------------------------------------|
| chr01   | 46000000  | 46199999  | 0.031   | AKR1A1;NASP;CCDC17;GPBP1L1;RPS15AP10;TMEM69;IPP                                           |
| chr01   | 104000000 | 104199999 | 0.031   | LOC101928436;RNPC3;AMY2B;ACTG1P4;AMY2A;AMY1A;AMY1C;AMY1B                                  |
| chr01   | 235600000 | 235799999 | 0.034   | TBCE;B3GALNT2;GNG4                                                                        |
| chr01   | 184800000 | 184999999 | 0.035   | FAM129A                                                                                   |
| chr01   | 220400000 | 220599999 | 0.046   | RAB3GAP2;AURKAPS1                                                                         |
| chr01   | 44200000  | 44399999  | 0.049   | ST3GAL3;ST3GAL3;ARTN                                                                      |
| chr01   | 149400000 | 149599999 | 0.05    | RNVU1-19;PPIAL4A;PPIAL4C;LINC00623;LINC00869;LOC103091866                                 |
| chr01   | 196200000 | 196399999 | 0.05    | KCNT2                                                                                     |
| chr02   | 149000000 | 149199999 | 0.029   | MBD5                                                                                      |
| chr02   | 183600000 | 183799999 | 0.049   | DNAJC10;FRZB;NCKAP1                                                                       |
| chr03   | 196000000 | 196199999 | 0.03    | PCYT1A;TCTEX1D2;TM4SF19-TCTEX1D2;TM4SF19-AS1;TM4SF19;UBXN7;RNF168                         |
| chr03   | 52200000  | 52399999  | 0.031   | ALAS1;TLR9;TWF2;PPM1M;WDR82;GLYCTK;GLYCTK-AS1;DNAH1                                       |
| chr03   | 140200000 | 140399999 | 0.038   | CLSTN2;CLSTN2-AS1;TRIM42                                                                  |
| chr03   | 165200000 | 165399999 | 0.045   | LINC01322                                                                                 |
| chr03   | 67800000  | 67999999  | 0.049   | SUCLG2-AS1                                                                                |
| chr04   | 70000000  | 70199999  | 0.008   | UGT2B11;UGT2B28                                                                           |
| chr04   | 37600000  | 37799999  | 0.037   | RELL1                                                                                     |
| chr04   | 151400000 | 151599999 | 0.042   | LRBA;MAB21L2                                                                              |
| chr05   | 65200000  | 65399999  | 0.018   | ERBB2IP;LOC100303749                                                                      |
| chr05   | 70000000  | 70199999  | 0.034   | SERF1A;SERF1B;SMN1;SMN2;GUSBP9                                                            |
| chr05   | 134000000 | 134199999 | 0.038   | SEC24A;CAMLG;DDX46;C5orf24                                                                |
| chr05   | 29000000  | 29199999  | 0.04    | LOC101929645;LOC101929660                                                                 |
| chr06   | 27600000  | 27799999  | 0.009   | LINC01012;LOC100131289;HIST1H2BL;HIST1H2AI;HIST1H3H;HIST1H2AJ;HIST1H2BM;HIST1H4J;HIST1H4K |

|       |           |           |       |                                                |
|-------|-----------|-----------|-------|------------------------------------------------|
| chr06 | 32400000  | 32599999  | 0.013 | HLA-DRA;HLA-DRB5;HLA-DRB6;HLA-DRB1             |
| chr06 | 131800000 | 131999999 | 0.017 | ARG1;MED23;ENPP3                               |
| chr06 | 28400000  | 28599999  | 0.03  | ZSCAN23;GPX6;GPX5;ZBED9                        |
| chr06 | 45800000  | 45999999  | 0.036 | CLIC5                                          |
| chr06 | 27400000  | 27599999  | 0.045 | ZNF184                                         |
| chr06 | 20600000  | 20799999  | 0.048 | CDKAL1                                         |
| chr07 | 26600000  | 26799999  | 0.028 | C7orf71;SKAP2                                  |
| chr07 | 122000000 | 122199999 | 0.033 | CADPS2                                         |
| chr07 | 124400000 | 124599999 | 0.05  | GPR37;C7orf77;POT1;POT1-AS1                    |
| chr08 | 26400000  | 26599999  | 0.035 | DPYSL2                                         |
| chr08 | 30000000  | 30199999  | 0.037 | MBOAT4;DCTN6                                   |
| chr08 | 119200000 | 119399999 | 0.048 | SAMD12                                         |
| chr09 | 41000000  | 41199999  | 0.002 | FAM74A1;ZNF658B                                |
| chr09 | 19000000  | 19199999  | 0.015 | SAXO1;RRAGA;HAUS6;SCARNA8;PLIN2                |
| chr09 | 39400000  | 39599999  | 0.015 | SPATA31A1;FAM74A1;ZNF658B                      |
| chr09 | 125600000 | 125799999 | 0.023 | RC3H2;SNORD90;ZBTB6;ZBTB26;RABGAP1;GPR21       |
| chr09 | 88400000  | 88599999  | 0.027 | LOC389765;NAA35                                |
| chr09 | 73600000  | 73799999  | 0.045 | TRPM3                                          |
| chr10 | 103200000 | 103399999 | 0.028 | BTRC;POLL;DPCD;FBXW4                           |
| chr10 | 47800000  | 47999999  | 0.034 | PTPN20;BMS1P5;ANXA8;FAM25C;FAM25G;AGAP9;BMS1P6 |
| chr10 | 38400000  | 38599999  | 0.035 | ZNF37A;LOC100129055                            |
| chr10 | 129800000 | 129999999 | 0.035 | PTPRE;MKI67                                    |
| chr10 | 73400000  | 73599999  | 0.037 | CDH23;C10orf105;C10orf54;PSAP                  |
| chr10 | 27200000  | 27399999  | 0.043 | LINC00202-1;ANKRD26;YME1L1                     |
| chr11 | 111800000 | 111999999 | 0.009 | DIXDC1;DLAT;PIH1D2;C11orf57;TIMM8B;SDHD        |
| chr11 | 85800000  | 85999999  | 0.028 | EED                                            |

|       |           |           |       |                                                                  |
|-------|-----------|-----------|-------|------------------------------------------------------------------|
| chr11 | 18400000  | 18599999  | 0.031 | LDHA;LDHC;LDHAL6A;TSG101;UEVLD                                   |
| chr11 | 58200000  | 58399999  | 0.046 | OR5B12;OR5B21;LPXN;ZFP91-CNTF;ZFP91;CNTF                         |
| chr12 | 4600000   | 4799999   | 0.024 | C12orf4;RAD51AP1;DYRK4;AKAP3;NDUFA9                              |
| chr12 | 50600000  | 50799999  | 0.029 | LIMA1;FAM186A;LARP4                                              |
| chr12 | 101200000 | 101399999 | 0.041 | ANO4                                                             |
| chr12 | 88000000  | 88199999  | 0.045 | MKRN9P                                                           |
| chr12 | 15200000  | 15399999  | 0.048 | RERG;RERG-AS1                                                    |
| chr12 | 110800000 | 110999999 | 0.05  | ANAPC7;ARPC3;GPN3;FAM216A;VPS29;RAD9B;PPTC7                      |
| chr13 | 95800000  | 95999999  | 0.037 | ABCC4                                                            |
| chr14 | 20800000  | 20999999  | 0.047 | CCNB1IP1;RPPH1;PARP2;TEP1;KLHL33;OSGEP;APEX1;TMEM55B;PNP;RNASE10 |
| chr15 | 42000000  | 42199999  | 0.033 | MGA;MAPKBP1;JMJD7;JMJD7-PLA2G4B;PLA2G4B;SPTBN5;EHD4              |
| chr16 | 47400000  | 47599999  | 0.005 | ITFG1;PHKB                                                       |
| chr17 | 31000000  | 31199999  | 0.039 | MYO1D                                                            |
| chr17 | 43400000  | 43599999  | 0.042 | ARHGAP27;PLEKHM1;LRRC37A4P                                       |
| chr18 | 10800000  | 10999999  | 0.028 | PIEZO2                                                           |
| chr18 | 12000000  | 12199999  | 0.038 | IMPA2;ANKRD62                                                    |
| chr18 | 31400000  | 31599999  | 0.049 | NOL4                                                             |
| chr19 | 19400000  | 19599999  | 0.05  | SUGP1;MAU2;GATAD2A                                               |
| chr20 | 3800000   | 3999999   | 0.041 | AP5S1;MAVS;PANK2;RNF24                                           |
| chr21 | 32400000  | 32599999  | 0.017 | KRTAP19-8;TIAM1                                                  |
| chr21 | 48000000  | 48199999  | 0.048 | S100B;PRMT2                                                      |

---
